# Supplementary material for: Delivery of affordable and scalable encapsulated allogenic/autologous mesenchymal stem cells in coagulated platelet poor plasma for dental pulp regeneration
Source: PubMed Central journal article supplement (PMC8748942; doi:10.1038/s41598-021-02118-0), 2022-01-10

**A**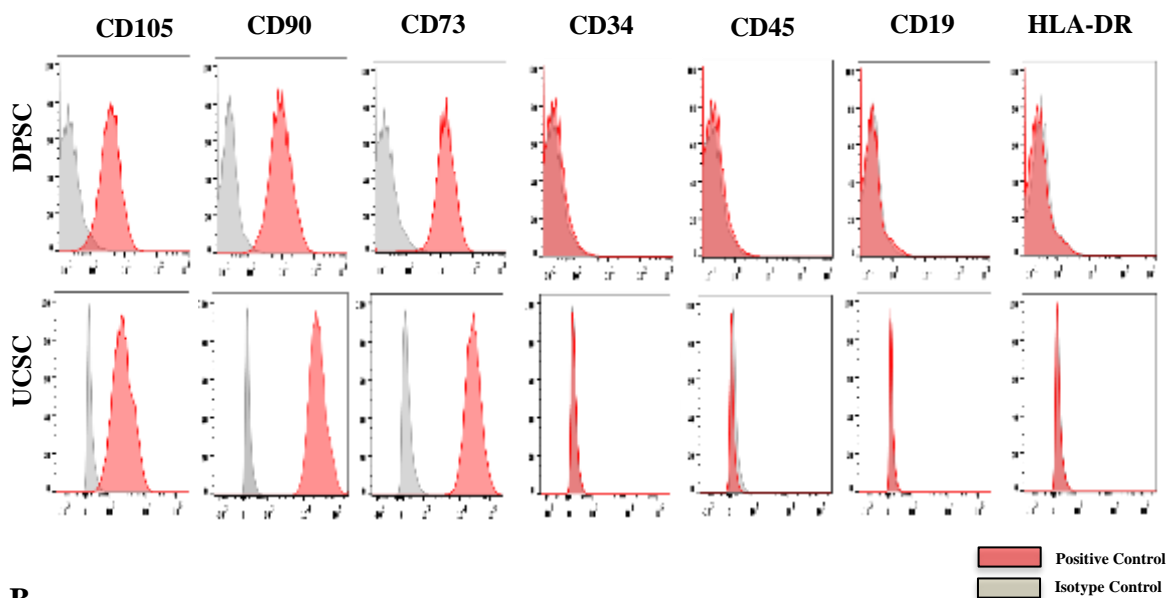**B**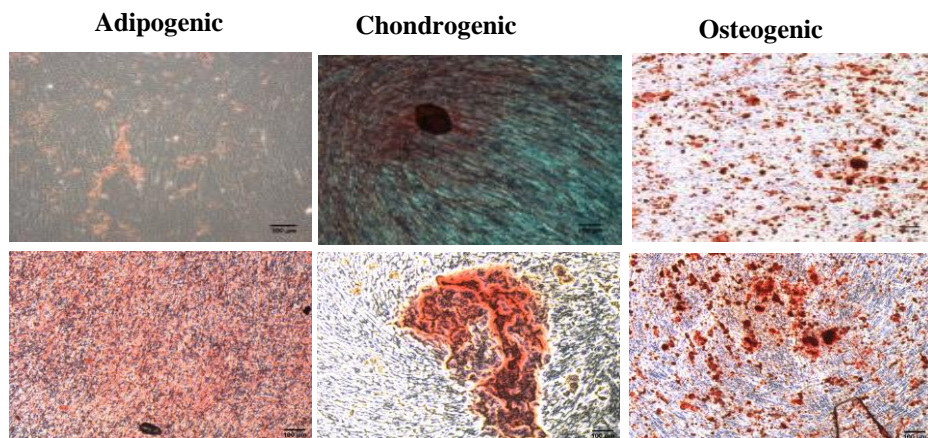**C**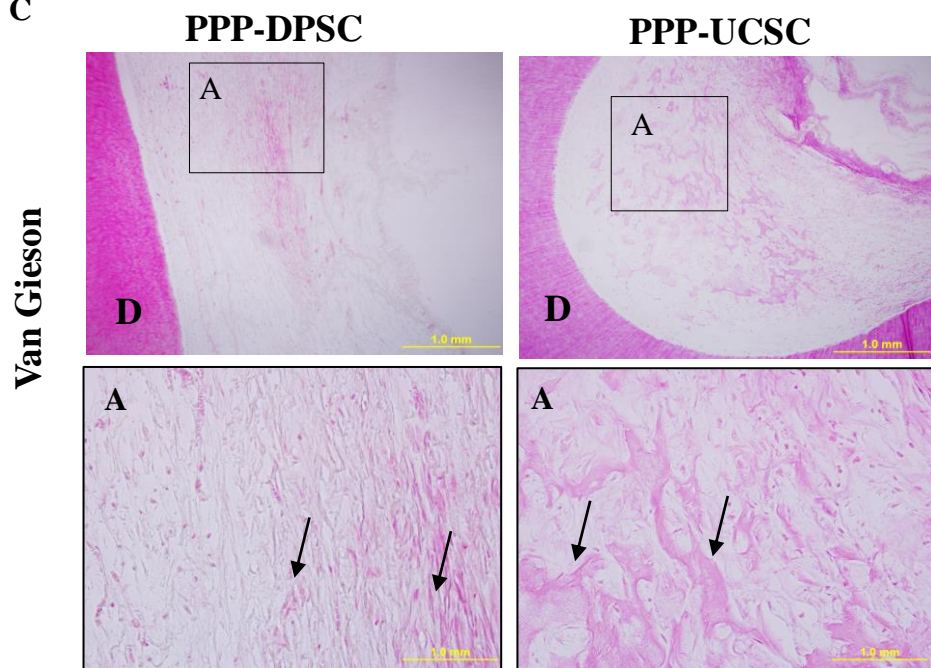

Supplement: 41598_2021_2118_MOESM2_ESM.pdf [file 41598_2021_2118_MOESM2_ESM.pdf]
